# Supplementary material
Source: PubMed Central journal article supplement (PMC3137573)
Supplement: supp_ASN.2010040367_Supplemental_information.pdf [file supp_ASN.2010040367_Supplemental_information.pdf]

## SUPPLEMENTAL INFORMATION:

**Supplemental Table 1.** Energy metabolism-related miRNAs up-regulated in old kidney and target genes

| MiRNA name           | Target gene symbol     | Target gene name (mitochondrial respiratory chain-related genes) |
|----------------------|------------------------|------------------------------------------------------------------|
| rno-miR-141          | Cyb5                   | Cytochrome b5                                                    |
| rno-miR-184          | Cyb5b                  | Cytochrome b5 type B                                             |
| rno-miR-142-5p,7a    | Cyb5r4                 | Cytochrome b5 reductase 4                                        |
| rno-miR-542-3p       | Cyc1                   | Cytochrome c1 heme protein                                       |
| rno-miR-340-5p       | COX1                   | Cytochrome c oxidase subunit 1                                   |
| rno-miR-333          | COX2, 7AP2, 7C, 15, 19 | Cytochrome c oxidase subunit 2, VIIa, 7C, 15, 19                 |
| rno-miR-708          | Cox4i1                 | Cytochrome c oxidase subunit 4 isoform 1                         |
| rno-miR-223          | Cox6a2, 7b2            | Cytochrome c oxidase polypeptide Via, VIIb2                      |
| rno-miR-142-5p       | Cox7b                  | Cytochrome c oxidase subunit VIIb                                |
| rno-miR-34c          | Cox8h                  | Cytochrome c oxidase polypeptide VIII                            |
| rno-miR-224          | Cox15                  | Cytochrome c oxidase assembly protein                            |
| rno-miR-350, 351     | COX19                  | Cytochrome c oxidase assembly protein                            |
| rno-miR-34a          | Etfb                   | Electron transfer flavoprotein subunit beta                      |
| rno-miR-142-5p       | Etfdh                  | Electron transfer flavoprotein-ubiquinone oxidoreductase         |
| rno-miR-333          | UQCRC1                 | Ubiquinol-cytochrome-c reductase complex core protein1, 2        |
| rno-miR-350          | Atp5a1, 5c1            | ATP synthase subunit alpha, gamma                                |
| rno-miR-141          | Atp5c1                 | ATP synthase gamma chain                                         |
| rno-miR-223, 333, 7a | Atp5e                  | ATP synthase epsilon chain                                       |
| rno-miR-224          | Atp5f1                 | ATP synthase B chain                                             |
| rno-miR-212          | Atp5g3                 | ATP synthase lipid-binding protein                               |
| rno-miR-542-3p       | Atp5o                  | ATP synthase O subunit                                           |
| rno-miR-141          | Ndufs4                 | NADH dehydrogenase [ubiquinone] iron-sulfur protein 4            |
| rno-miR-21           | Ndufs5b                | NADH dehydrogenase (ubiquinone) Fe-S protein 5b                  |
| rno-miR-34a          | Ndufs7                 | NADH dehydrogenase (ubiquinone) Fe-S protein 7                   |
| rno-miR-184          | Ndufa4l2               | NADH dehydrogenase(ubiquinone)1alpha subcomplex, 4-like 2        |
| rno-miR-224          | Ndufb2                 | NADH dehydrogenase [ubiquinone] 1 beta subcomplex subunit 2      |
| rno-miR-542-3p       | Ndufb5                 | NADH dehydrogenase [ubiquinone] 1 beta subcomplex subunit 5      |
|                      | Ndufv2                 | NADH dehydrogenase [ubiquinone] flavoprotein                     |
| rno-miR-223,333      | NU4M                   | NADH-ubiquinone oxidoreductase chain 4                           |
| rno-miR-223          | Sdha                   | Succinate dehydrogenase [ubiquinone] flavoprotein subunit        |
| rno-miR-184, 351     | Sdhc                   | Succinate dehydrogenase complex, subunit C                       |
| rno-miR-132, 212     | Sdhd                   | Succinate dehydrogenase[ubiquinone] cytochrome b small subunit   |
| rno-miR-184          | Polg                   | Mitochondrial DNA polymerase catalytic subunit                   |
| rno-miR-350          | Tfam                   | Mitochondrial Transcription factor A                             |
| rno-miR-132,212,7a   | Mtif2                  | Mitochondrial translational initiation factor 2                  |
| rno-miR-542-3p       | Tfb2m                  | Mitochondrial dimethyladenosine transferase 2                    |
| MiRNA name           | Target gene symbol     | Target gene name (energy metabolism-regulating genes)            |
| rno-miR-212          | FoxA1, FoxO3a          | Forkhead box protein A1, O3A                                     |
|                      | AMPK $\beta$ -2        | 5'-AMP-activated protein kinase $\beta$ -2 chain                 |

|                     |                              |                                                                |
|---------------------|------------------------------|----------------------------------------------------------------|
| rno-miR-132,212     | AMPK $\gamma$ -1             | 5'-AMP-activated protein kinase $\gamma$ -1 chain              |
|                     | IGFBP-6                      | Insulin-like growth factor-binding protein 6                   |
| rno-miR-333         | AMPK $\alpha$ -2, $\beta$ -1 | 5'-AMP-activated protein kinase $\alpha$ -2, $\beta$ -1 chains |
| rno-miR-142-5p, 333 | PPAR- $\gamma$               | Peroxisome proliferator-activated receptor $\gamma$            |
| rno-miR-351         | LEP                          | Leptin                                                         |

**Supplemental Table 2.** Cell proliferation-related miRNAs differentially expressed in old kidney and target genes

| <b>MiRNA up-regulated</b>   | <b>Target gene symbol</b> | <b>Target gene name</b>                                       |
|-----------------------------|---------------------------|---------------------------------------------------------------|
| rno-miR-142-5p              | eIF4EBP1                  | Eukaryotic translation initiation factor 4E-binding protein 1 |
|                             | TAF13                     | Transcription initiation factor TFIID subunit 13              |
| rno-miR-184                 | CDK6                      | Cyclin-dependent kinase 6                                     |
|                             | GTF2I                     | General transcription factor II I                             |
|                             | E2F1                      | Transcription factor E2F1                                     |
| rno-miR-21                  | PCNA                      | Proliferating cell nuclear antigen                            |
|                             | CDK10                     | Cell division protein kinase 10                               |
| rno-miR-212                 | E2F5                      | Transcription factor E2F5                                     |
|                             | EIF4A2                    | Eukaryotic initiation factor 4A-II                            |
| rno-miR-223                 | CDK2                      | Cell division protein kinase 2                                |
|                             | CCNA1                     | Cyclin A1                                                     |
| rno-miR-224                 | CDK7                      | Cell division protein kinase 7                                |
|                             | PCNA                      | Proliferating Cell Nuclear Antigen                            |
| rno-miR-333                 | CCNA1,CCNE1               | Cyclin A1, Cyclin E1                                          |
|                             | CDC16                     | Cell division cycle protein 16                                |
|                             | GTF3C1                    | General transcription factor 3C polypeptide 1                 |
| rno-miR-335                 | GTF3C1                    | General transcription factor 3C polypeptide 1                 |
|                             | eIF3                      | Eukaryotic translation initiation factor 3 subunit            |
|                             | PCNA                      | Proliferating cell nuclear antigen                            |
|                             | CDK4                      | Cyclin-dependent kinase 4                                     |
| rno-miR-34c                 | CCNM3                     | Cyclin M3                                                     |
| rno-miR-542-3p              | EIF2B1                    | Translation initiation factor eIF-2B subunit alpha            |
|                             | TAF11                     | Transcription initiation factor TFIID subunit 11              |
|                             | eEF1A2                    | Elongation factor 1-alpha 1                                   |
| rno-miR-708                 | E2F6                      | E2F transcription factor 6                                    |
|                             | CDK8                      | Cyclin-dependent kinase 8                                     |
| <b>MiRNA down-regulated</b> | <b>Target gene symbol</b> | <b>Target gene name</b>                                       |
| rno-miR-365                 | P21                       | Cyclin-dependent kinase inhibitor 1A                          |
|                             | P16Ink4a                  | Cyclin-dependent kinase inhibitor 2A                          |

**Supplemental Table 3.** ECM-related miRNAs differentially expressed in old kidney and target genes

| <b>MiRNA up-regulated</b>   | <b>Target gene symbol</b> | <b>Target gene name (ECM degradation genes)</b>             |
|-----------------------------|---------------------------|-------------------------------------------------------------|
| rno-miR-223                 | MMP1a                     | Matrix metalloproteinase 1a                                 |
| rno-miR-333                 | MMP2                      | Matrix metalloproteinase 2                                  |
| rno-miR-132, 340-5p         | MMP9                      | Matrix metalloproteinase 9                                  |
| rno-miR-142-5p              | MMP10                     | Matrix metalloproteinase 10                                 |
| rno-miR-351                 | MMP11, 12                 | Matrix metalloproteinase 11, 12                             |
| rno-miR-212, 333            | MMP13                     | Matrix metalloproteinase 13                                 |
| rno-miR-132, 212            | MMP14                     | Matrix metalloproteinase14                                  |
| rno-miR-708                 | MMP15                     | Matrix metalloproteinase 15                                 |
| rno-miR-132, 212, 340-5p    | MMP16                     | Matrix metalloproteinase 16                                 |
| rno-miR-542-3p              | MMP23                     | Matrix metalloproteinase 23                                 |
| rno-miR-333                 | MMP20, 25                 | Matrix metalloproteinase 20, 25                             |
|                             | PLG                       | Plasminogen                                                 |
| rno-miR-184, 335            | YME1L1                    | ATP-dependent metalloprotease                               |
| <b>MiRNA down-regulated</b> | <b>Target gene symbol</b> | <b>Target gene name (ECM synthesis genes)</b>               |
| rno-miR-129                 | VIM                       | Vimentin                                                    |
| rno-miR-290                 | COL4A5, 9A1               | Collagen type IV alpha 5, type IX alpha 1                   |
| rno-miR-329                 | FGB                       | Fibrinogen beta chain                                       |
| rno-miR-339                 | COL25A1                   | Collagen type XXV alpha 1                                   |
| rno-miR-365                 | COL4A4, 9A3, 14A1         | Collagen type IV alpha 4, type IX alpha 3, type XIV alpha 1 |
|                             | FGB                       | Fibrinogen beta chain                                       |
| rno-miR-347                 | COL5A3, 20A1              | Collagen type V alpha 3, type XX alpha 1                    |
|                             | COL23A1, 26A1             | Collagen type XXIII alpha 1, type XXVI alpha 1              |
|                             | ELN                       | Elastin                                                     |
|                             | Tek2                      | Tektin-2                                                    |
|                             | AGRN                      | Agrin                                                       |
|                             | FBN3                      | Fibrillin-3                                                 |
|                             | FGA                       | Fibrinogen alpha chain                                      |
|                             | TIMP-2                    | Metalloproteinase inhibitor 2 precursor                     |
| rno-miR-378                 | COL2a1, 5a2, 9a2          | Collagen type II alpha 1, type V alpha 2, type IX alpha 2   |
|                             | Ecm1                      | Extracellular matrix protein 1                              |
|                             | ITGA5                     | Fibronectin receptor alpha (integrin, alpha 5)              |
| rno-miR-378*                | COL11A2                   | Collagen, type XI, alpha 2                                  |
|                             | TNX                       | Tenascin-X                                                  |
| rno-miR-451                 | COL5A3, 14A1              | Collagen type V alpha 3, type XIV alpha 1                   |
| rno-miR-494                 | COL7A1,11A1,15A1          | Collagen type VII alpha 1, type XI alpha 1, type XV alpha 1 |
|                             | FGA                       | Fibrinogen alpha chain                                      |

**Supplemental Table 4.** Immune inflammatory-related miRNAs down-regulated in old kidney and target genes

| <b>MiRNA name</b> | <b>Target gene symbol</b> | <b>Target gene name (Cytokines: IL, IFN,TNF, Chemokine, etc.)</b> |
|-------------------|---------------------------|-------------------------------------------------------------------|
| rno-miR-12        | IL-2, 16, 17re            | Interleukin-2, 16, 17re                                           |
|                   | CCL24                     | Chemokine (C-C motif) ligand 24                                   |

|              |                        |                                                                     |
|--------------|------------------------|---------------------------------------------------------------------|
| rno-miR-290  | IL-1 alpha             | Interleukin 1 alpha                                                 |
|              | TNFRSF5                | Tumor necrosis factor receptor superfamily, member 5                |
|              | CCL28,CCR-4            | Chemokine (C-C motif) ligand 28, receptor type 4                    |
| rno-miR-329  | IL-13ra1               | Interleukin 13 receptor, alpha 1                                    |
|              | CCL1                   | Chemokine (C-C motif) ligand 1                                      |
|              | LTB4-R 1               | Leukotriene B4 receptor 1                                           |
|              | CRP                    | C reactive protein                                                  |
|              | CD40LG                 | CD40 ligand                                                         |
| rno-miR-339  | IL-13                  | T-cell activation protein P600                                      |
|              | TNF-beta               | Lymphotoxin-alpha                                                   |
| rno-miR-347  | IL-17RA, 19, 21R, 31RA | Interleukin-17 receptor A, 19, 21R, 31RA                            |
|              | IFNGR2, RF-5           | Interferon-gamma receptor beta chain,Interferon regulatory factor 5 |
|              | TNFSF10,15             | Tumor necrosis factor ligand superfamily, member 10,15              |
|              | TNFRSF1A,4,5,12A       | Tumor necrosis factor receptor superfamily member1A, 4, 5, 12A      |
|              | CCR-4,CX3CR1           | C-C chemokine receptor type 4, CX3C chemokine receptor 1            |
|              | LTB4-R 1               | Leukotriene B4 receptor 1                                           |
|              | LTA                    | lymphotoxin A                                                       |
|              | ICAM-1, 2, 4, 5        | Intercellular adhesion molecule 1, 2, 4, 5                          |
|              | CD40, 40LG             | CD40, CD40 ligand                                                   |
|              | NFKB2                  | NF-kappa-B p100 subunit                                             |
|              | Rel A                  | NF-kappa-B p65 subunit                                              |
|              | rno-miR-365            | IL-1F7                                                              |
| IFNGR        |                        | Interferon gamma receptor 1                                         |
| LTB          |                        | Lymphotoxin B                                                       |
| rno-miR-378  | IL-3, 5, 13, 18BP      | Interleukin-3, 5, 13, 18BP                                          |
|              | IL-2rg, 20R1           | Interleukin 2 receptor, gamma; 20 receptor alpha chain              |
|              | CCR-3                  | C-C chemokine receptor type 3                                       |
| rno-miR-378* | IL-12A                 | Interleukin-11R-alpha, 12A                                          |
|              | TNFRSF5                | Tumor necrosis factor receptor superfamily, member 5                |
|              | TGF-alpha              | Transforming growth factor alpha                                    |
|              | CD40LG                 | CD40 ligand                                                         |
| rno-miR-451  | IL-1RAP,13, 15, 27, 31 | Interleukin-1 receptor accessory protein, 13, 15, 27, 31            |
|              | TNF-R1                 | Tumor necrosis factor receptor superfamily member 1A                |
|              | CCR-3                  | C-C chemokine receptor type 3                                       |
| rno-miR-494  | IL-1F6, RAK-2          | Interleukin-1 family member 6, receptor-associated kinase-like 2    |
|              | IL-15                  | Interleukin-15                                                      |
|              | RANKL                  | Tumor necrosis factor ligand superfamily member 11                  |
|              | CXC-R4                 | C-X-C chemokine receptor type 4                                     |

| <b>MiRNA name</b> | <b>Target gene symbol</b> | <b>Target gene name (Complement, Phagocyte, Toll-like receptor)</b> |
|-------------------|---------------------------|---------------------------------------------------------------------|
| rno-miR-129       | Cfh                       | Complement component factor H                                       |
|                   | Mst1r                     | Macrophage stimulating 1 receptor                                   |
| rno-miR-290       | C1r, C5                   | Complement component C1r, C5                                        |
|                   | FcRII                     | Fc gamma Receptor II                                                |
| rno-miR-329       | C1RL,C4A                  | Complement component 1, r subcomponent-like; C4A                    |

|              |              |                                                              |
|--------------|--------------|--------------------------------------------------------------|
|              | Granzyme M   | Natural killer cell granular protease                        |
| rno-miR-339  | FCGR1A       | High-affinity immunoglobulin gamma Fc receptor I             |
|              | TLR4         | Toll-like receptor 4                                         |
| rno-miR-347  | C1qtnf1      | C1q and tumor necrosis factor related protein 1              |
|              | C1qa         | Complement component 1, q subcomponent, alpha polypeptide    |
|              | C8A, C8G     | Complement component 8, alpha polypeptide; gamma chain       |
|              | GZMM         | Granzyme M                                                   |
| rno-miR-365  | CD44,CD160   | Phagocytic glycoprotein 1, Natural killer cell receptor BY55 |
| rno-miR-378  | C7, Cfi, Cfb | Complement component 7, factor I, factor B                   |
|              | FCGR1A       | High-affinity immunoglobulin gamma Fc receptor I             |
|              | TLR4         | Toll-like receptor 4                                         |
| rno-miR-378* | C1RL, C4     | Complement component 1, r subcomponent-like; C4              |
| rno-miR-451  | TLR10        | Toll-like receptor 10                                        |

---
